# Supplementary material for: Recommendations on Weight Loss and Healthy Lifestyle in Prostate Cancer Clinical Guidelines: A Systematic Review
Source: MDPI journal article supplement (doi:10.3390/ijerph19031452), 2022-01-27
Supplement: s1 [file s1]

Supplementary Table S4. Appraisal of Guidelines for Research & Evaluation (AGREE-II) assessment of clinical practice guidelines on prostate cancer that complied with recommendations for healthy weight or lifestyle habits ( $n = 13$ ). The complete version of the tool is available from <https://agreetrust.org>. The tool is composed by 23 items. Each item is assessed in a 7-point scale (from 1: strongly disagree to 7: strongly agree). Therefore, the maximum punctuation of the tool is 161 points. The percentage of the punctuation according to the maximum possible punctuation for each domain is presented in the cells. Correspondence between each guideline (Entity, year) and their complete name can be consulted in Supplementary Table S2. The guidelines are presented divided by year of the last update.

| Entity, year                    | Domain 1:<br>Scope and<br>purpose<br>(items 1-3) | Domain 2:<br>Stakeholder<br>involvement<br>(items 4-6) | Domain 3:<br>Rigour of<br>development<br>(items 7-14) | Domain 4:<br>Clarity of<br>presentation<br>(items 15-17) | Domain 5:<br>Applicability<br>(items 18-21)<br>(MPP: 28) | Domain 6:<br>Editorial<br>Independence<br>(items 22-23) | Total score<br>(Global<br>Quality) |
|---------------------------------|--------------------------------------------------|--------------------------------------------------------|-------------------------------------------------------|----------------------------------------------------------|----------------------------------------------------------|---------------------------------------------------------|------------------------------------|
| AWMF-DKG-DKH, 2021              | 85.7%                                            | 76.2%                                                  | 75.0%                                                 | 85.7%                                                    | 71.4%                                                    | 42.9%                                                   | 5 / 7                              |
| CUA, 2021a                      | 80.1%                                            | 47.6%                                                  | 46.4%                                                 | 90.5%                                                    | 85.7%                                                    | 28.6%                                                   | 4 / 7                              |
| MIMS, 2021                      | 47.6%                                            | 57.1%                                                  | 44.6%                                                 | 76.2%                                                    | 71.4%                                                    | 35.7%                                                   | 3.5 / 7                            |
| BC, 2020b                       | 80.1%                                            | 57.1%                                                  | 42.8%                                                 | 81.0%                                                    | 67.9%                                                    | 71.4%                                                   | 4 / 7                              |
| CUA, 2020b                      | 85.7%                                            | 85.7%                                                  | 83.9%                                                 | 81.0%                                                    | 67.9%                                                    | 50.0%                                                   | 5.5 / 7                            |
| EAU-EANM-ESTRO-ESUR-SIOG, 2020b | 80.1%                                            | 81.0%                                                  | 87.5%                                                 | 85.7%                                                    | 71.4%                                                    | 85.7%                                                   | 6 / 7                              |
| ESMO, 2020                      | 71.4%                                            | 81.0%                                                  | 87.5%                                                 | 85.7%                                                    | 78.6%                                                    | 85.7%                                                   | 6 / 7                              |
| ASCO, 2018                      | 80.1%                                            | 76.2%                                                  | 83.9%                                                 | 100%                                                     | 67.9%                                                    | 71.4%                                                   | 6 / 7                              |
| ASCO-ASTRO-SUO, 2017            | 80.1%                                            | 81.0%                                                  | 83.9%                                                 | 85.7%                                                    | 71.4%                                                    | 71.4%                                                   | 6 / 7                              |
| IKNL, 2017                      | 42.8%                                            | 28.6%                                                  | 35.7%                                                 | 47.6%                                                    | 60.7%                                                    | 28.6%                                                   | 3 / 7                              |
| SAUA, 2017                      | 52.4%                                            | 52.4%                                                  | 35.7%                                                 | 28.6%                                                    | 50.0%                                                    | 28.6%                                                   | 3 / 7                              |
| CCO, 2016b                      | 52.4%                                            | 76.2%                                                  | 92.9%                                                 | 85.7%                                                    | 85.7%                                                    | 35.7%                                                   | 5.5 / 7                            |
| NCCP, 2016                      | 90.5%                                            | 85.7%                                                  | 92.9%                                                 | 90.5%                                                    | 89.3%                                                    | 35.7%                                                   | 6.5 / 7                            |
| <b>Mean</b>                     | 70.4%                                            | 67.1%                                                  | 67.4%                                                 | 78.2%                                                    | 72.3%                                                    | 50.0%                                                   | 4.5 / 7                            |
