# Supplementary material for: Recommendations on Weight Loss and Healthy Lifestyle in Prostate Cancer Clinical Guidelines: A Systematic Review
Source: MDPI journal article supplement (doi:10.3390/ijerph19031452), 2022-01-27
Supplement: s1 [file s1]

### Supplementary Table S3.

Identified clinical practice guidelines and consensus statements not published in a journal.

|                                                                                                                                                                                                                         |
|-------------------------------------------------------------------------------------------------------------------------------------------------------------------------------------------------------------------------|
| (CMS). Council for Medical Schemes. PMB definition guideline: Prostate cancer. 2020.                                                                                                                                    |
| (SAUA). South African Urological Association. South African prostate cancer guidelines. 2017.                                                                                                                           |
| (MIMS). Malaysian multi-channel provider of drug information, medical education and services. Prostate Cancer. 2021.                                                                                                    |
| (EAU-EANM-ESTRO-ESUR-SIOG). EAU-EANM-ESTRO-ESUR-SIOG. Biochemical recurrence in prostate cancer: The EAU Prostate Cancer Guidelines Panel's recommendations. 2020.                                                      |
| (EAU-ESTRO-ESOR-SIOG). EAU-ESTRO-ESOR-SIOG Guidelines on prostate cancer. 2018.                                                                                                                                         |
| (DUCG). DUCG's National Guidelines for Diagnosis and Treatment of Prostate Cancer, 2015.                                                                                                                                |
| (AWMF-DKG-DKH). AWMF-DKG-DKH. S3 prostate cancer guideline. 2021.                                                                                                                                                       |
| (AWMF). AWMF. PSMA ligand PET/CT in the diagnosis of prostate carcinoma. 2019.                                                                                                                                          |
| (NCCP). NCCP. National Prostate Cancer GP Referral Guideline. 2018.                                                                                                                                                     |
| (NCCP). NCCP. Diagnosis, staging and treatment of patients with prostate cancer. National Clinical Guideline No. 8. 2016.                                                                                               |
| (NCCN). Prostate cancer early detection. NCCN Clinical Practice Guidelines in Oncology. 2019.                                                                                                                           |
| (IKNL). IKNL. Prostate cancer, national guideline version 3.0. 2017.                                                                                                                                                    |
| (Zoginstituut Netherlands). Zorginstituut Netherlands. Appropriate use of pharmaceutical products for patients with castration-refractory prostate cancer. 2016.                                                        |
| (NVU). NVU. Prostate cancer. 2016.                                                                                                                                                                                      |
| AUA-ASTRO-SUO. Advanced prostate cancer: AUA-ASTRO-SUO guideline. 2020.                                                                                                                                                 |
| (NICE). The National Institute for Health and Care Excellence. Enzalutamide for treating hormone-sensitive metastatic prostate cancer (technology appraisal guidance TA712). 2021.                                      |
| (NICE). The National Institute for Health and Care Excellence. Darolutamide with androgen deprivation therapy for treating hormone-relapsed non-metastatic prostate cancer (technology appraisal guidance TA660). 2020. |
| (NICE). The National Institute for Health and Care Excellence. Prostate cancer: diagnosis and management. (NICE guideline NG131). 2019.                                                                                 |
| (NICE). The National Institute for Health and Care Excellence. Enzalutamide for hormone-relapsed non-metastatic prostate cancer (Technology appraisal guidance TA580). 2019.                                            |
| (NICE). The National Institute for Health and Care Excellence. Padeliporfin for untreated localised prostate cancer (Technology appraisal guidance TA546). 2018.                                                        |
| (NICE). The National Institute for Health and Care Excellence. Memokath-051 stent for ureteric obstruction (Medical technologies guidance MTG35). 2018.                                                                 |
| (NICE). The National Institute for Health and Care Excellence. Biodegradable spacer insertion to reduce rectal toxicity during radiotherapy for prostate cancer (Interventional procedures guidance IPG590). 2017       |
| (NICE). The National Institute for Health and Care Excellence. Irreversible electroporation for treating prostate cancer. Interventional procedures guidance [IPG572]. 2016.                                            |
| (NICE). The National Institute for Health and Care Excellence. Radium-223 dichloride for treating hormone-relapsed prostate cancer with bone metastases (Technology appraisal guidance TA412. 2016.                     |
| (NICE). The National Institute for Health and Care Excellence. Cabazitaxel for hormone-relapsed metastatic prostate cancer treated with docetaxel (Technology appraisal guidance TA391). 2016.                          |
| (NICE). The National Institute for Health and Care Excellence. Degarelix for treating advanced hormone-dependent prostate cancer (Technology appraisal guidance TA404). 2016.                                           |

|                                                                                                                                                                                                                                    |
|------------------------------------------------------------------------------------------------------------------------------------------------------------------------------------------------------------------------------------|
| (NICE). The National Institute for Health and Care Excellence. Abiraterone for castration-resistant metastatic prostate cancer previously treated with a docetaxel-containing regimen (Technology appraisal guidance TA259). 2016. |
| (NICE). The National Institute for Health and Care Excellence. Abiraterone for treating metastatic hormone-relapsed prostate cancer before chemotherapy is indicated (Technology appraisal guidance TA387). 2016.                  |
| (NICE). The National Institute for Health and Care Excellence. Enzalutamide for treating metastatic hormone-relapsed prostate cancer before chemotherapy is indicated (Technology appraisal guidance TA377). 2016.                 |
| (NICE). The National Institute for Health and Care Excellence. Suspected cancer: recognition and referral (NICE guideline NG12). 2015.                                                                                             |
| (CCO). CCO. Multiparametric Magnetic Resonance Imaging in the Diagnosis of Clinically Significant Prostate Cancer. Guideline 27-2 version 2. 2021.                                                                                 |
| (CCA). Cancer Care Alberta. Local prostate cancer. Clinical Practice Guideline GU-012 – Version 3. 2020.                                                                                                                           |
| (CCA). Cancer Care Alberta. Advanced/Metastatic prostate cancer. Clinical Practice Guideline GU-010 – Version 2. 2020.                                                                                                             |
| (BC). British Columbia. Prostate Cancer Part 1: Diagnosis and Referral in Primary Care. 2020.                                                                                                                                      |
| (BC). British Columbia. Prostate Cancer Part 2: Follow-up in Primary Care. 2020.                                                                                                                                                   |
| (CCO). Cancer Care Ontario. An Endorsement of the 2018 Guideline on Hypofractionated Radiation Therapy for Localized Prostate Cancer: An ASTRO, ASCO, and AUA Evidence-Based Guideline. 2018.                                      |
| (CCO). Cancer Care Ontario. Guideline for Optimization of Surgical and Pathological Quality Performance for Radical Prostatectomy in Prostate Cancer Management. Evidence-Based Series 17-3 Version 2. 2017.                       |
| (CCO). Cancer Care Ontario. Cancer Care Ontario Position Statement on Prostate Cancer Screening using the Prostate-Specific Antigen (PSA) Test. 2017.                                                                              |
| (CCO). Cancer Care Ontario. Bone Health and Bone-Targeted Therapies for Prostate Cancer. Guideline 3-14 Version 2. 2016.                                                                                                           |
| (CCA). Cancer Control Alberta. Prostate cancer. 2015.                                                                                                                                                                              |
| (ACS). ACS. Prostate cancer prevention and early detection. 2019.                                                                                                                                                                  |
| (AUA). AUA. Castration-resistant prostate cancer Cookson. 2019.                                                                                                                                                                    |
| (AUA). AUA. Early detection of prostate cancer: AUA guideline. 2018                                                                                                                                                                |
| (AUA-ASTRO-SUO). Clinically Localized Prostate Cancer: AUA-ASTRO-SUO Guideline. 2017.                                                                                                                                              |
| (NCCN). NCCN Clinical Practice Guidelines in Oncology (NCCN Guidelines). Version 3. 2016.                                                                                                                                          |
| (PCFA). PCFA. Clinical practice guidelines: PSA Testing and Early Management of Test-Detected Prostate Cancer. 2016.                                                                                                               |
| (MSC). MSC. AUGC Clinical Guidelines. Prostate cancer in patients over 15 years old. 2015.                                                                                                                                         |
| (AMUC). AMUC. Prostate cancer. Risk factors, early detection and PSA: screening, use and correct interpretation. 2018.                                                                                                             |
| (IMSS). IMSS. Prostate cancer diagnosis and treatment. Clinical practice guidelines. 2018.                                                                                                                                         |
| (AUNA). AUNA. Clinical practice guideline: prostate cancer. 2019.                                                                                                                                                                  |
| (IETSI). IETSI. Clinical practice guideline for the screening, diagnosis and treatment of localized and locally advanced prostate cancer. 2021.                                                                                    |
| (INEN). INEN. Clinical Practice Guideline for the early detection, diagnosis, staging, treatment, rehabilitation and follow-up of patients with prostate cancer. 2021.                                                             |
